# Supplementary material
Source: PubMed Central journal article supplement (PMC2151720)
Supplement: plntphys_pp.107.106526_1.pdf [file plntphys_pp.107.106526_1.pdf]

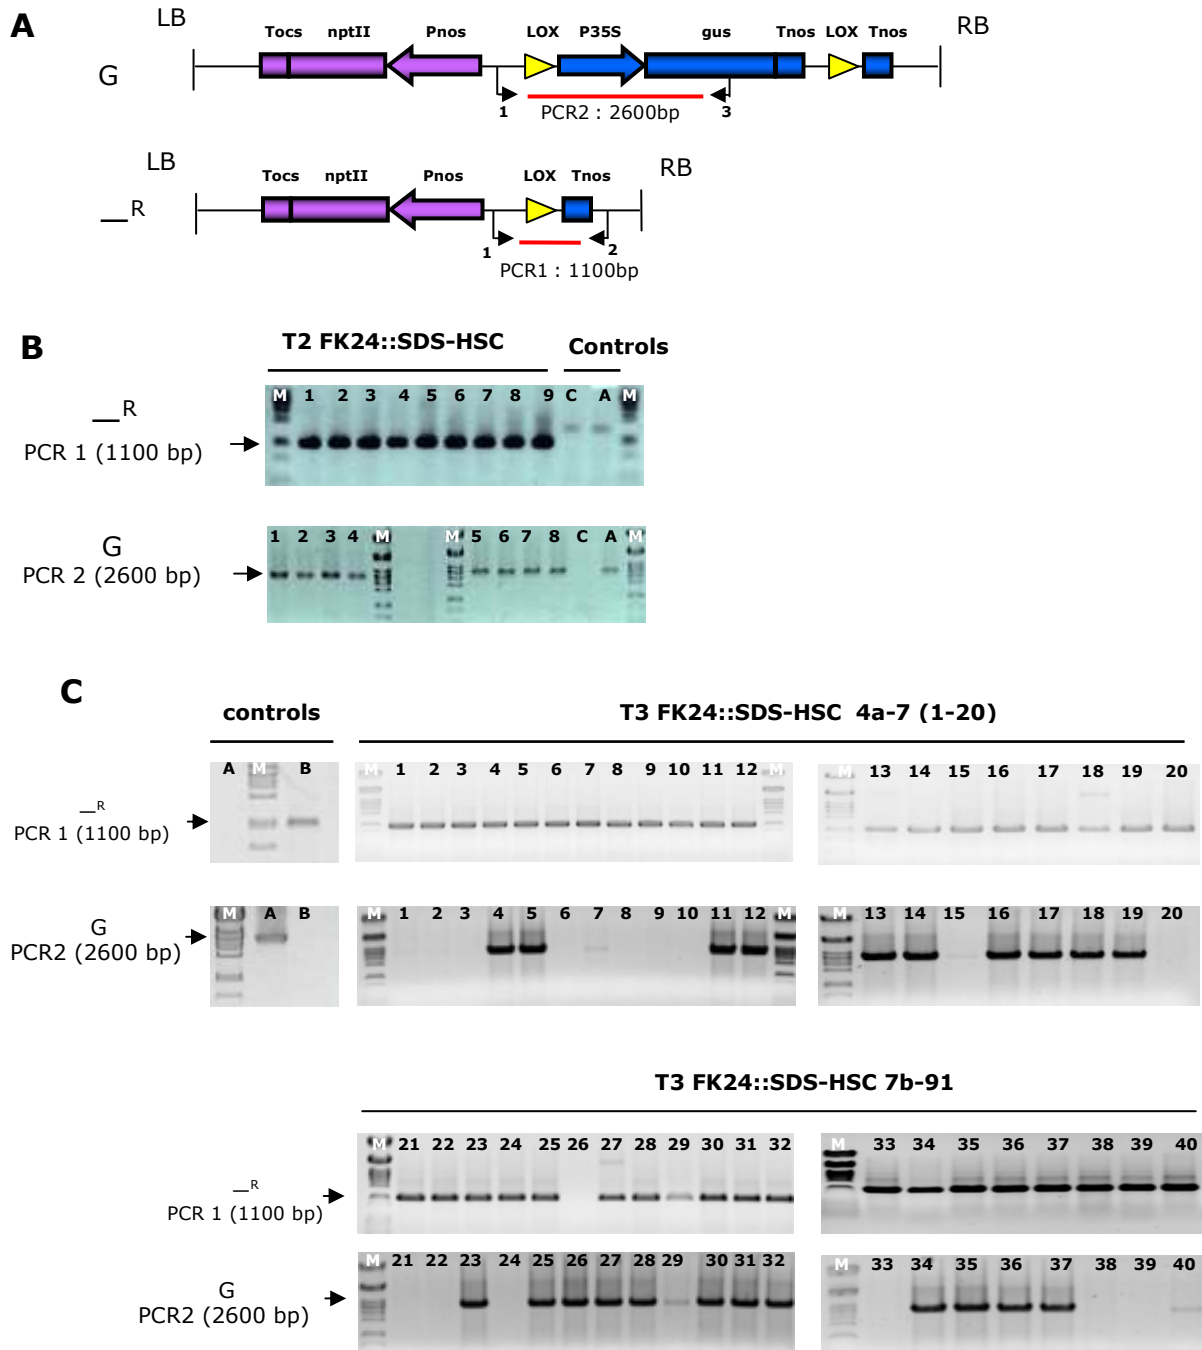

**Supplemental Figure 1:** Functionality of the pSDS-cre fusions in the lines used for the reciprocal crosses, 4a and 7b. Panel A: Schematic presentation of the K2L610 T-DNA (De Buck et al., 1998), containing the *p35S-gus* chimeric gene, referred to as GUS allele (G) and the recombined allele ( $-^R$ ). The FK24 plant line is homozygous for a single copy insertion of the K2L610 T-DNA. Primers used for PCR analysis are indicated below the constructs. Panel B: PCR on DNA prepared from T2 FK24::SDS-HSC plants. PCR1: primer LoxuitKP3 (primer 1) and Loxdel2 (primer 2); PCR2: primer LoxuitKP3 (primer 1) and GusR (primer 3) Lane A: FK24; lane C: Wild type; lane M: lambda DNA cut with *Pst*I; lane 1→8: T2 FK24::SDS-HSC. Lane 1:4a-7; lane 2: 4a-22; lane 3: 4a-99; lane 4: 7b-14; lane 5: 7b-36; lane 6: 7b-69; lane 7: 7b-91; lane 8: 7b-98; lane 9: FK24::35S-HSC-13-f. Panel C: PCR on DNA prepared from T3 FK24::SDS-HSC offspring plants from the T2 FK24::SDS-HSC-4a-7 and FK24::SDS-HSC-7b-91 plants. Lane A: FK24; lane B: FK24::35S-HSC; lane M: lambda DNA cut with *Pst*I. lane 1→20: PCR on DNA from T3 SDS-HSC-4a-7 plants 1→20; lane 21→40: PCR on DNA from T3 SDS-HSC-7b-91 plants 1→20.
