# Supplementary material
Source: PubMed Central journal article supplement (PMC2151720)
Supplement: plntphys_pp.107.106526_2.pdf [file plntphys_pp.107.106526_2.pdf]

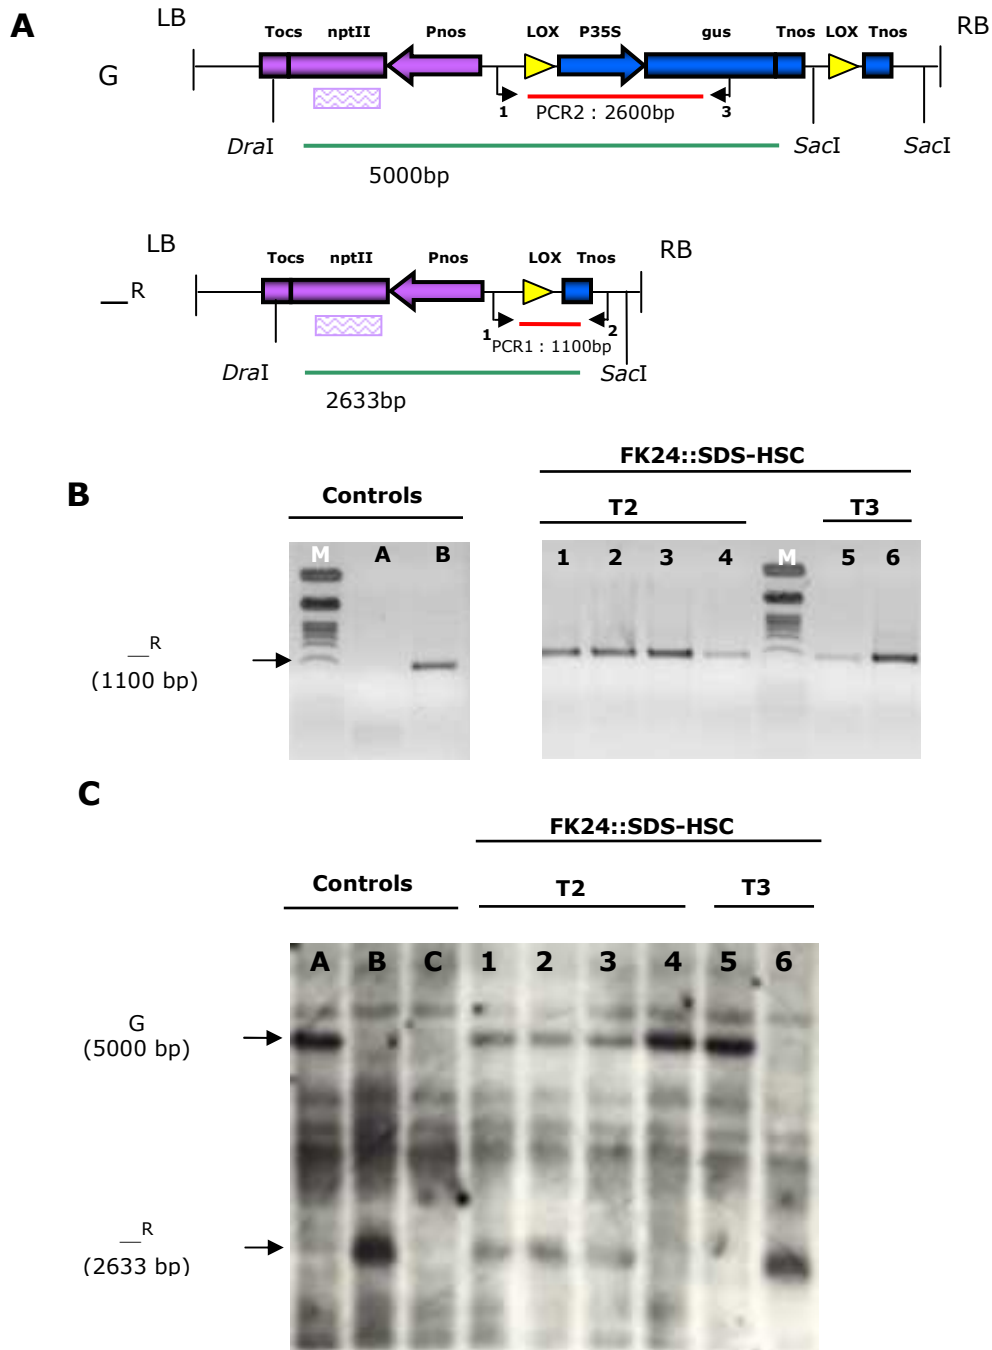

**Supplemental Figure 2:** Comparison between PCR data and Southern data indicating limited somatic background excision. Panel A: Schematic presentation of the K2L610 T-DNA (De Buck et al., 1998), containing the *p35S-gus* chimeric gene, referred to as GUS allele (G) and the recombined allele ( $-^R$ ). The FK24 plant line is homozygous for a single copy insertion of the K2L610 T-DNA. Primers used for PCR analysis are indicated below the constructs as well as the restriction enzymes and probe used for the Southern blot. Panel B: PCR on DNA prepared from T2 and T3 FK24::SDS-HSC plants using primer 1 (LoxuitKP3) and primer 2 (Loxdel2) screening for the recombined allele ( $-^R$ ) of the K2L610 T-DNA. Lane A: FK24; lane B: FK24::35S-HSC; lane M: lambda DNA cut with *Pst*I; lane 1→4: T2 FK24::SDS-HSC-4a-1→4; lane 5→6: T3 FK24::SDS-HSC-4a-7-a→b. Panel C: Southern blot analysis on DNA purified from T2-T3 FK24::SDS-HSC plants. DNA was cut with *Dra*I and *Sac*I and probed with the *npt*II probe (⊞). Lane A: FK24; lane B: FK24::35S-HSC; lane C: Col-0; lane 1→4: T2 FK24::SDS-HSC-4a-1→4; lane 5→6: T3 FK24::SDS-HSC-4a-7-a→b.
