# Supplementary material
Source: PubMed Central journal article supplement (PMC2151720)
Supplement: plntphys_pp.107.106526_4.pdf [file plntphys_pp.107.106526_4.pdf]

**Supplemental Table 1:** Overview of the segregation analysis on kanamycin and hygromycin of T2 seeds, collected from primary transformants (T1) selected on hygromycin, of the promoterless Lox2DR control construct.

| T2 seeds     | Selection on Kanamycin |    |             |                                     | Selection on Hygromycin |     |             |
|--------------|------------------------|----|-------------|-------------------------------------|-------------------------|-----|-------------|
|              | R                      | S  | $K_{R/S}^1$ | $\chi^2$<br>P-value<br>(fits ratio) | R                       | S   | $H_{R/S}^2$ |
| Lox2DR-2-4   | 98                     | 28 | <b>3.5</b>  | 0.47 (3:1)                          | 194                     | 66  | <b>2.9</b>  |
| Lox2DR-2-6   | 95                     | 32 | <b>2.97</b> | 0.96 (3:1)                          | 181                     | 62  | <b>2.9</b>  |
| Lox2DR-9-1   | 94                     | 25 | <b>3.76</b> | 0.31 (3:1)                          | 275                     | 100 | <b>2.75</b> |
| Lox2DR-9-6   | 84                     | 31 | <b>2.71</b> | 0.62 (3:1)                          | 229                     | 79  | <b>2.90</b> |
| Lox2DR-10-2  | 96                     | 28 | <b>3.43</b> | 0.53 (3:1)                          | 162                     | 58  | <b>2.79</b> |
| Lox2DR-10-20 | 93                     | 25 | <b>3.72</b> | 0.34 (3:1)                          | 205                     | 61  | <b>3.36</b> |

<sup>1</sup>  $K_{R/S}$ : ratio resistant to sensitive plants on kanamycin.

<sup>2</sup>  $H_{R/S}$ : ratio resistant to sensitive plants on hygromycin.
