# Supplementary material
Source: PubMed Central journal article supplement (PMC2151720)
Supplement: plntphys_pp.107.106526_6.pdf [file plntphys_pp.107.106526_6.pdf]

**Supplemental Table 3:** Overview of the results of the segregation analysis on kanamycin and hygromycin of T2 seeds, collected from primary transformants (T1) selected on hygromycin, in module 1 (promoter fragment of the *APETALA1* gene from *Arabidopsis thaliana*).

| T2 seeds | Selection on Kanamycin |    |                        |                                     | Selection on Hygromycin |     |                        |
|----------|------------------------|----|------------------------|-------------------------------------|-------------------------|-----|------------------------|
|          | R                      | S  | $K_{R/S}$ <sup>1</sup> | $\chi^2$<br>P-value<br>(fits ratio) | R                       | S   | $H_{R/S}$ <sup>2</sup> |
| AP1-0-11 | 100                    | 26 | <b>3.84</b>            | 0.26 (3:1)                          | 182                     | 72  | <b>2.53</b>            |
| AP1-7-1  | 90                     | 31 | <b>2.9</b>             | 0.93 (3:1)                          | 130                     | 120 | <b>1.08</b>            |
| AP1-7-4  | 89                     | 31 | <b>2.87</b>            | 0.83 (3:1)                          | 54                      | 203 | <b>0.27</b>            |
| AP1-7-7  | 96                     | 37 | <b>2.6</b>             | 0.45 (3:1)                          | 184                     | 78  | <b>2.36</b>            |
| AP1-8-12 | 93                     | 29 | <b>3.2</b>             | 0.75 (3:1)                          | 48                      | 186 | <b>0.26</b>            |
| AP1-9-2  | 91                     | 36 | <b>2.5</b>             | 0.38 (3:1)                          | 161                     | 89  | <b>1.81</b>            |
| AP1-10-4 | 97                     | 34 | <b>2.85</b>            | 0.80 (3:1)                          | 54                      | 212 | <b>0.25</b>            |
| AP1-12-7 | 91                     | 35 | <b>2.6</b>             | 0.47 (3:1)                          | 157                     | 94  | <b>1.67</b>            |
| AP1-14-2 | 75                     | 28 | <b>2.7</b>             | 0.61 (3:1)                          | 150                     | 71  | <b>2.1</b>             |
| AP1-14-4 | 100                    | 28 | <b>3.6</b>             | 0.50 (3:1)                          | 38                      | 223 | <b>0.17</b>            |
| AP1-14-5 | 83                     | 29 | <b>2.86</b>            | 0.83 (3:1)                          | 119                     | 113 | <b>1.05</b>            |
| AP1-15-6 | 85                     | 28 | <b>3.03</b>            | 0.86 (3:1)                          | 138                     | 109 | <b>1.27</b>            |

<sup>1</sup>  $K_{R/S}$ : ratio resistant to sensitive plants on kanamycin.

<sup>2</sup>  $H_{R/S}$ : ratio resistant to sensitive plants on hygromycin.
