# Supplementary material
Source: PubMed Central journal article supplement (PMC2151720)
Supplement: plntphys_pp.107.106526_7.pdf [file plntphys_pp.107.106526_7.pdf]

**Supplemental Table 4:** Overview of the results of the segregation analysis on kanamycin and hygromycin of T3 seeds, collected from T2 plants containing only a recombined allele (PCR1+ and PCR2-; Fig. 5) in module 1.

| T3 seeds     | Selection on Kanamycin |    |              |                                     | Selection on Hygromycin |     |             |
|--------------|------------------------|----|--------------|-------------------------------------|-------------------------|-----|-------------|
|              | R                      | S  | $K_{R/S}^1$  | $\chi^2$<br>P-value<br>(fits ratio) | R                       | S   | $H_{R/S}^1$ |
| AP1-7-4/K2   | 75                     | 28 | <b>2.7</b>   | 0.61 (3:1)                          | 0                       | 121 | <b>0</b>    |
| AP1-7-4/K3   | 78                     | 31 | <b>2.5</b>   | 0.43 (3:1)                          | 0                       | 112 | <b>0</b>    |
| AP1-7-4/K4   | 82                     | 40 | <b>2.1</b>   | 0.05 (3:1)                          | 0                       | 121 | <b>0</b>    |
| AP1-7-4/K5   | 80                     | 31 | <b>2.6</b>   | 0.48 (3:1)                          | 0                       | 135 | <b>0</b>    |
| AP1-7-4/K6   | 97                     | 38 | <b>2.6</b>   | 0.40 (3:1)                          | 0                       | 140 | <b>0</b>    |
| AP1-7-4/K8   | 71                     | 19 | <b>3.7</b>   | 0.40 (3:1)                          | 0                       | 89  | <b>0</b>    |
| AP1-7-4/K9   | 97                     | 39 | <b>2.5</b>   | 0.32 (3:1)                          | 0                       | 136 | <b>0</b>    |
| AP1-7-4/K14  | 98                     | 36 | <b>2.7</b>   | 0.62 (3:1)                          | 0                       | 138 | <b>0</b>    |
| AP1-7-4/K16  | 93                     | 37 | <b>2.5</b>   | 0.36 (3:1)                          | 0                       | 122 | <b>0</b>    |
| AP1-7-4/K17  | 83                     | 7  | <b>11.86</b> |                                     | 0                       | 107 | <b>0</b>    |
| AP1-14-4/K1  | 85                     | 0  |              |                                     | 0                       | 106 | <b>0</b>    |
| AP1-14-4/K5  | 73                     | 31 | <b>2.35</b>  | 0.26 (3:1)                          | 0                       | 63  | <b>0</b>    |
| AP1-14-4/K6  | 80                     | 33 | <b>2.42</b>  | 0.30 (3:1)                          | 0                       | 118 | <b>0</b>    |
| AP1-14-4/K7  | 73                     | 33 | <b>2.21</b>  | 0.14 (3:1)                          | 0                       | 71  | <b>0</b>    |
| AP1-14-4/K9  | 124                    | 0  |              |                                     | 0                       | 120 | <b>0</b>    |
| AP1-14-4/K10 | 65                     | 31 | <b>2.1</b>   | 0.1 (3:1)                           | 0                       | 118 | <b>0</b>    |
| AP1-14-4/K11 | 69                     | 23 | <b>3</b>     | 1 (3:1)                             | 0                       | 116 | <b>0</b>    |
| AP1-14-4/K12 | 96                     | 27 | <b>3.6</b>   | 0.43 (3:1)                          | 0                       | 107 | <b>0</b>    |
| AP1-14-4/K14 | 78                     | 33 | <b>2.33</b>  | 0.25 (3:1)                          | 0                       | 124 | <b>0</b>    |
| AP1-8-12/K1  | 122                    | 0  |              |                                     | 0                       | 115 | <b>0</b>    |
| AP1-8-12/K2  | 91                     | 32 | <b>2.84</b>  | 0.80 (3:1)                          | 0                       | 129 | <b>0</b>    |
| AP1-8-12/K4  | 91                     | 25 | <b>3.64</b>  | 0.39 (3:1)                          | 0                       | 111 | <b>0</b>    |
| AP1-8-12/K5  | 94                     | 41 | <b>2.29</b>  | 0.15 (3:1)                          | 0                       | 133 | <b>0</b>    |
| AP1-8-12/K6  | 77                     | 25 | <b>3.08</b>  | 0.91 (3:1)                          | 0                       | 114 | <b>0</b>    |
| AP1-8-12/K7  | 80                     | 0  |              |                                     | 0                       | 85  | <b>0</b>    |
| AP1-8-12/K8  | 86                     | 21 | <b>4.01</b>  | 0.20 (3:1)                          | 0                       | 108 | <b>0</b>    |
| AP1-8-12/K9  | 103                    | 0  |              |                                     | 0                       | 136 | <b>0</b>    |
| AP1-8-12/K10 | 209                    | 61 | <b>3.4</b>   | 0.36 (3:1)                          | 0                       | 139 | <b>0</b>    |
| AP1-8-12/K12 | 92                     | 22 | <b>4.18</b>  | 0.16 (3:1)                          | 0                       | 123 | <b>0</b>    |

|              |     |    |             |            |   |     |          |
|--------------|-----|----|-------------|------------|---|-----|----------|
| AP1-8-12/K13 | 90  | 31 | <b>2.9</b>  | 0.87 (3:1) | 0 | 98  | <b>0</b> |
| AP1-8-12/K15 | 93  | 31 | <b>3</b>    | 1 (3:1)    | 0 | 133 | <b>0</b> |
| AP1-10-4/K1  | 124 | 0  |             |            | 0 | 132 | <b>0</b> |
| AP1-10-4/K2  | 110 | 0  |             |            | 0 | 108 | <b>0</b> |
| AP1-10-4/K5  | 88  | 35 | <b>2.5</b>  | 0.38 (3:1) | 0 | 135 | <b>0</b> |
| AP1-10-4/K7  | 72  | 25 | <b>2.88</b> | 0.86 (3:1) | 0 | 121 | <b>0</b> |
| AP1-10-4/K9  | 89  | 28 | <b>3.18</b> | 0.79 (3:1) | 0 | 130 | <b>0</b> |
| AP1-10-4/X   | 111 | 0  |             |            | 0 | 112 | <b>0</b> |
| AP1-10-4/Y   | 97  | 35 | <b>2.77</b> | 0.69 (3:1) | 0 | 122 | <b>0</b> |

<sup>1</sup> K<sub>R/S</sub>: ratio resistant to sensitive plants on kanamycin.

<sup>2</sup> H<sub>R/S</sub>: ratio resistant to sensitive plants on hygromycin.
