# Supplementary material
Source: PubMed Central journal article supplement (PMC2151720)
Supplement: plntphys_pp.107.106526_8.pdf [file plntphys_pp.107.106526_8.pdf]

**Supplemental Table 5:** Overview of the results of the segregation analysis on kanamycin and hygromycin of T2 seeds, collected from primary transformants (T1) selected on hygromycin, in module 2 (promoter fragment of the *SOLO DANCERS* gene from *Arabidopsis thaliana*).

| T2 seeds | Selection on Kanamycin |    |                        |                                     | Selection on Hygromycin |     |                        |
|----------|------------------------|----|------------------------|-------------------------------------|-------------------------|-----|------------------------|
|          | R                      | S  | $K_{R/S}$ <sup>1</sup> | $\chi^2$<br>P-value<br>(fits ratio) | R                       | S   | $H_{R/S}$ <sup>2</sup> |
| SDS-1-2  | 88                     | 31 | <b>2.84</b>            | 0.79 (3:1)                          | 117                     | 92  | <b>1.27</b>            |
| SDS-1-10 | 67                     | 23 | <b>2.9</b>             | 0.90 (3:1)                          | 150                     | 87  | <b>1.72</b>            |
| SDS-1-14 | 95                     | 32 | <b>2.97</b>            | 0.96 (3:1)                          | 126                     | 122 | <b>1.03</b>            |
| SDS-1-21 | 82                     | 29 | <b>2.83</b>            | 0.78 (3:1)                          | 93                      | 96  | <b>0.97</b>            |
| SDS-1-23 | 100                    | 34 | <b>2.94</b>            | 0.92 (3:1)                          | 132                     | 109 | <b>1.21</b>            |
| SDS-3-2  | 94                     | 29 | <b>3.24</b>            | 0.72 (3:1)                          | 163                     | 69  | <b>2.36</b>            |
| SDS-7-1  | 74                     | 23 | <b>3.2</b>             | 0.77 (3:1)                          | 105                     | 73  | <b>1.44</b>            |
| SDS-7-4  | 59                     | 16 | <b>3.67</b>            | 0.47 (3:1)                          | 116                     | 71  | <b>1.63</b>            |
| SDS-8-1  | 62                     | 25 | <b>2.48</b>            | 0.42 (3:1)                          | 145                     | 83  | <b>1.75</b>            |
| SDS-8-6  | 77                     | 22 | <b>3.5</b>             | 0.52 (3:1)                          | 110                     | 67  | <b>1.64</b>            |
| SDS-9-10 | 68                     | 25 | <b>2.72</b>            | 0.67 (3:1)                          | 140                     | 86  | <b>1.63</b>            |
| SDS-11-2 | 69                     | 26 | <b>2.65</b>            | 0.57 (3:1)                          | 88                      | 71  | <b>1.24</b>            |

<sup>1</sup>  $K_{R/S}$ : ratio resistant to sensitive plants on kanamycin.

<sup>2</sup>  $H_{R/S}$ : ratio resistant to sensitive plants on hygromycin.
