# Supplementary material
Source: PubMed Central journal article supplement (PMC2151720)
Supplement: plntphys_pp.107.106526_9.pdf [file plntphys_pp.107.106526_9.pdf]

**Supplemental Table 6:** Overview of the segregation analysis on kanamycin, hygromycin and 5-Fluorocytosine of T3 seeds, collected from T2 plants containing a recombined and a non-recombined allele (PCR1+ and PCR2+; Fig. 5) in module 2.

| T3 seeds     | Selection on Kanamycin |   |             | Selection on Hygromycin |     |             | Selection on 5-Fluorocytosine |      |              |
|--------------|------------------------|---|-------------|-------------------------|-----|-------------|-------------------------------|------|--------------|
|              | R                      | S | $K_{S/R}^1$ | R                       | S   | $H_{R/S}^2$ | R                             | S    | $FC_{S/R}^3$ |
| SDS-1-14/H3  | 62                     | 0 | <b>0</b>    | 92                      | 80  | <b>1.15</b> | N.D. <sup>4</sup>             | N.D. | <b>N.D.</b>  |
| SDS-1-14/H5  | 81                     | 0 | <b>0</b>    | 80                      | 82  | <b>0.98</b> | 37                            | 37   | <b>1</b>     |
| SDS-1-14/H7  | 99                     | 0 | <b>0</b>    | 123                     | 113 | <b>1.09</b> | 28                            | 29   | <b>1.03</b>  |
| SDS-1-14/H10 | 101                    | 0 | <b>0</b>    | 82                      | 81  | <b>1.01</b> | 32                            | 39   | <b>1.22</b>  |
| SDS-1-23/H5  | 126                    | 0 | <b>0</b>    | 161                     | 105 | <b>1.53</b> | 25                            | 37   | <b>1.48</b>  |
| SDS-1-23/H8  | 141                    | 0 | <b>0</b>    | 128                     | 82  | <b>1.56</b> | 18                            | 56   | <b>3.125</b> |
| SDS-1-23/H10 | 121                    | 0 | <b>0</b>    | 130                     | 96  | <b>1.35</b> | 38                            | 36   | <b>0.94</b>  |
| SDS-1-2/H3   | 106                    | 0 | <b>0</b>    | 114                     | 92  | <b>1.24</b> | 33                            | 33   | <b>1</b>     |
| SDS-1-2/H6   | 97                     | 0 | <b>0</b>    | 125                     | 81  | <b>1.54</b> | 26                            | 36   | <b>1.39</b>  |
| SDS-1-21/H5  | 86                     | 0 | <b>0</b>    | 84                      | 106 | <b>0.79</b> | 34                            | 28   | <b>0.83</b>  |
| SDS-1-21/H6  | 89                     | 0 | <b>0</b>    | 85                      | 87  | <b>0.98</b> | 33                            | 26   | <b>0.79</b>  |
| SDS-11-2/H2  | 133                    | 0 | <b>0</b>    | 168                     | 95  | <b>1.77</b> | 20                            | 49   | <b>2.44</b>  |
| SDS-11-2/H4  | 129                    | 0 | <b>0</b>    | 148                     | 103 | <b>1.44</b> | 29                            | 41   | <b>1.41</b>  |
| SDS-11-2/H6  | 99                     | 0 | <b>0</b>    | 140                     | 104 | <b>1.35</b> | 29                            | 42   | <b>1.43</b>  |
| SDS-11-2/H9  | 115                    | 0 | <b>0</b>    | 161                     | 79  | <b>2</b>    | N.D.                          | N.D. | <b>N.D.</b>  |
| SDS-11-2/H11 | 121                    | 0 | <b>0</b>    | 149                     | 99  | <b>1.5</b>  | 31                            | 44   | <b>1.43</b>  |

---

---

<sup>1</sup>  $K_{R/S}$ : ratio resistant to sensitive plants on kanamycine.

<sup>2</sup>  $H_{R/S}$ : ratio resistant to sensitive plants on hygromycin.

<sup>3</sup>  $FC_{S/R}$ : ratio resistant to sensitive plants on 5-Fluorocytosine.

<sup>4</sup> N.D.: Not determined.
