# Supplementary material
Source: PubMed Central journal article supplement (PMC2151720)
Supplement: plntphys_pp.107.106526_10.pdf [file plntphys_pp.107.106526_10.pdf]

**Supplemental Table 7:** Overview of the segregation analysis on kanamycin and hygromycin of T4 seeds, collected from T3 plants resistant to 5-Fluorocytosine. The T3 plants originated from T2 plants containing a recombined and a non-recombined allele, indicating that the T3 plants resistant to 5-Fluorocytosine were homozygous for the GOI and marker-free. Several T4 plants, selected on kanamycin, were transferred to the greenhouse; DNA was purified from leaf material for Southern blot analysis (Fig. 5).

| T4 seeds        | Selection on Kanamycin |   |             | Selection on Hygromycin |      |             |
|-----------------|------------------------|---|-------------|-------------------------|------|-------------|
|                 | R                      | S | $K_{S/R}^1$ | R                       | S    | $H_{R/S}^2$ |
| SDS-1-2-H3/FC1  | 56                     | 0 | 0           | 0                       | 96   | 0           |
| SDS-1-2-H3/FC2  | 49                     | 0 | 0           | 0                       | 113  | 0           |
| SDS-1-2-H3/FC4  | 54                     | 0 | 0           | 0                       | 100  | 0           |
| SDS-1-2-H6/FC1  | 52                     | 0 | 0           | 0                       | 47   | 0           |
| SDS-1-2-H6/FC2  | 30                     | 0 | 0           | 0                       | 30   | 0           |
| SDS-1-2-H6/FC6  | 55                     | 0 | 0           | 0                       | 102  | 0           |
| SDS-1-14-H5/FC2 | 46                     | 0 | 0           | 0                       | 57   | 0           |
| SDS-1-14-H5/FC4 | 43                     | 0 | 0           | 0                       | 52   | 0           |
| SDS-1-14-H5/FC5 | 47                     | 0 | 0           | 0                       | 45   | 0           |
| SDS-1-14-H7/FC1 | 49                     | 0 | 0           | 0                       | 58   | 0           |
| SDS-1-14-H7/FC3 | 52                     | 0 | 0           | 0                       | 111  | 0           |
| SDS-1-14-H7/FC4 | 51                     | 0 | 0           | 0                       | 102  | 0           |
| SDS-1-21-H5/FC1 | 46                     | 0 | 0           | 0                       | 79   | 0           |
| SDS-1-21-H5/FC2 | 33                     | 0 | 0           | 0                       | 97   | 0           |
| SDS-1-21-H5/FC3 | 51                     | 0 | 0           | N.D. <sup>3</sup>       | N.D. | N.D.        |
| SDS-1-21-H6/FC2 | 43                     | 0 | 0           | 0                       | 81   | 0           |
| SDS-1-21-H6/FC3 | 44                     | 0 | 0           | 0                       | 83   | 0           |
| SDS-1-21-H6/FC5 | 37                     | 0 | 0           | 0                       | 81   | 0           |
| SDS-1-23-H5/FC3 | 38                     | 0 | 0           | N.D.                    | N.D. | N.D.        |
| SDS-1-23-H5/FC6 | 53                     | 0 | 0           | 0                       | 116  | 0           |

|                  |    |   |          |      |      |             |
|------------------|----|---|----------|------|------|-------------|
| SDS-1-23-H5/FC9  | 49 | 0 | <b>0</b> | 0    | 110  | <b>0</b>    |
| SDS-1-23-H10/FC1 | 53 | 0 | <b>0</b> | 0    | 107  | <b>0</b>    |
| SDS-1-23-H10/FC2 | 33 | 0 | <b>0</b> | 0    | 94   | <b>0</b>    |
| SDS-1-23-H10/FC5 | 48 | 0 | <b>0</b> | 0    | 100  | <b>0</b>    |
| SDS-11-2-H6/FC2  | 52 | 0 | <b>0</b> | 0    | 36   | <b>0</b>    |
| SDS-11-2-H6/FC3  | 55 | 0 | <b>0</b> | 0    | 54   | <b>0</b>    |
| SDS-11-2-H6/FC6  | 48 | 0 | <b>0</b> | N.D. | N.D. | <b>N.D.</b> |
| SDS-11-2-H11/FC1 | 44 | 0 | <b>0</b> | N.D. | N.D. | <b>N.D.</b> |
| SDS-11-2-H11/FC2 | 35 | 0 | <b>0</b> | 0    | 61   | <b>0</b>    |
| SDS-11-2-H11/FC3 | 25 | 0 | <b>0</b> | 0    | 64   | <b>0</b>    |

<sup>1</sup>  $K_{R/S}$ : ratio resistant to sensitive plants on kanamycin.

<sup>2</sup>  $H_{R/S}$ : ratio resistant to sensitive plants on hygromycin.

<sup>3</sup> N.D.: Not determined.
